# Supplementary material for: Safeguarding genome integrity during gene-editing therapy in a mouse model of age-related macular degeneration
Source: PubMed Central journal article supplement (PMC9780342; doi:10.1038/s41467-022-35640-4), 2022-12-22
Supplement: 41467_2022_35640_MOESM1_ESM.pdf [file 41467_2022_35640_MOESM1_ESM.pdf]

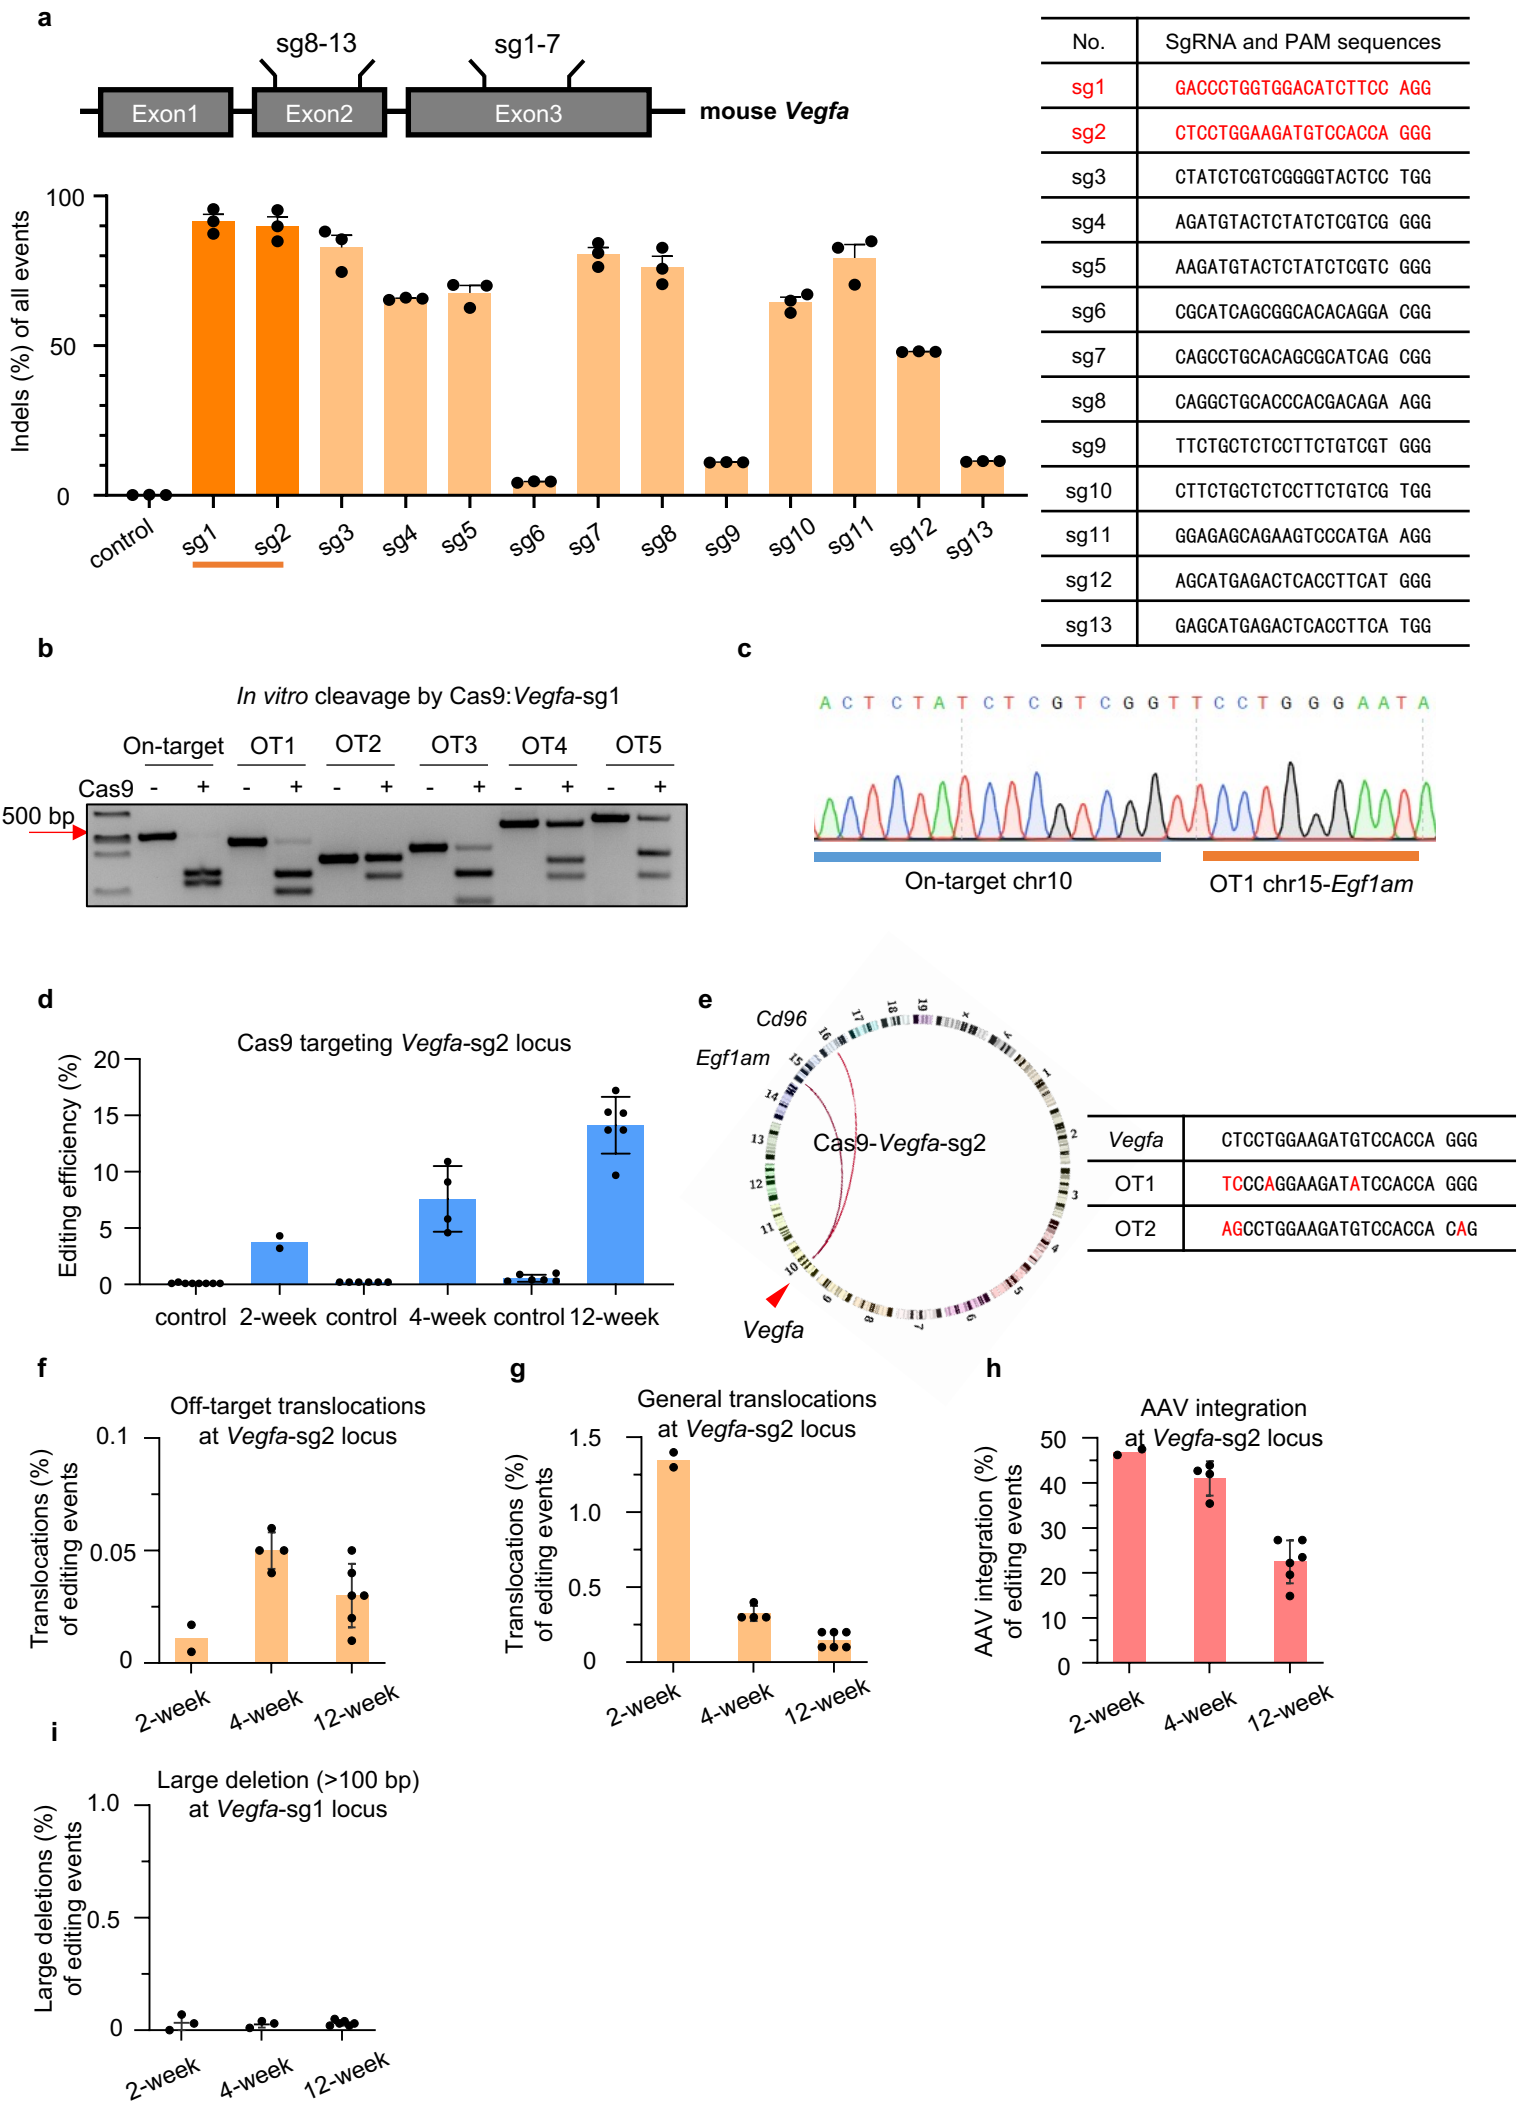

**Supplementary Figure 1 Chromatin structural variations detected in the mouse caused by Cas9.**

**a.** Percentage of indels for indicated sgRNAs targeting the exons 2 and 3 of *Vegfa* detected by targeting sequencing in N2a cells. Mean  $\pm$  SD from three biological replicates. SgRNA1 and SgRNA2 were selected for the following study. SgRNA sequences are listed on the right. **b.** Representative *in vitro* cleavage for off-target of *Vegfa*-sg1 by Cas9:*Vegfa*-sg1. Three replicates were performed. **c.** DNA sequence for chromosomal translocations at *Vegfa*-sg1 detected by Sanger sequencing. **d.** Editing efficiency for *Vegfa*-sg2 in mouse eye at 2-, 4- and 12-weeks post-transfection detected by PEM-seq. Error bars, mean  $\pm$  SD (For 2-, 4-, and 12-weeks post-PBS injection mice, n=8, 6, 6, respectively; for 2-, 4-, and 12-weeks post-AAV injection mice, n=2, 4, 6, respectively). **e.** Circos plot indicating translocations among on-target and off-targets of *Vegfa*-sg2 in mouse eye cells detected by PEM-seq. DNA sequences for on-target and off-targets of *Vegfa*-sg2 are shown in the table. Mismatches of DNA sequences between on-target and off-targets are in red. **f** and **g.** Percentages for off-target translocations (**f**) and general translocations (**g**) in mouse eye cloned from *mVegfa*-sg2 at 2-, 4- and 12-weeks post-transfection detected by PEM-seq. Error bars, mean  $\pm$  SD (For 2-, 4-, and 12-weeks post-AAV injection mice, n=2, 4, 6, respectively). **h.** Percentages of AAV integrations at *Vegfa*-sg2 normalized to editing events at 2-, 4- and 12-weeks post-transfection detected by PEM-seq. Error bars, mean  $\pm$  SD (For 2-, 4-, and 12-weeks post-AAV injection mice, n=2, 4, 6, respectively). **i.** Percentages of large deletions at *Vegfa*-sg1 at 2-, 4- and 12-weeks post-transfection detected by PEM-seq. Error bars, mean  $\pm$  SD (For 2-, 4-, and 12-weeks post-AAV injection mice, n=2, 4, 6, respectively).

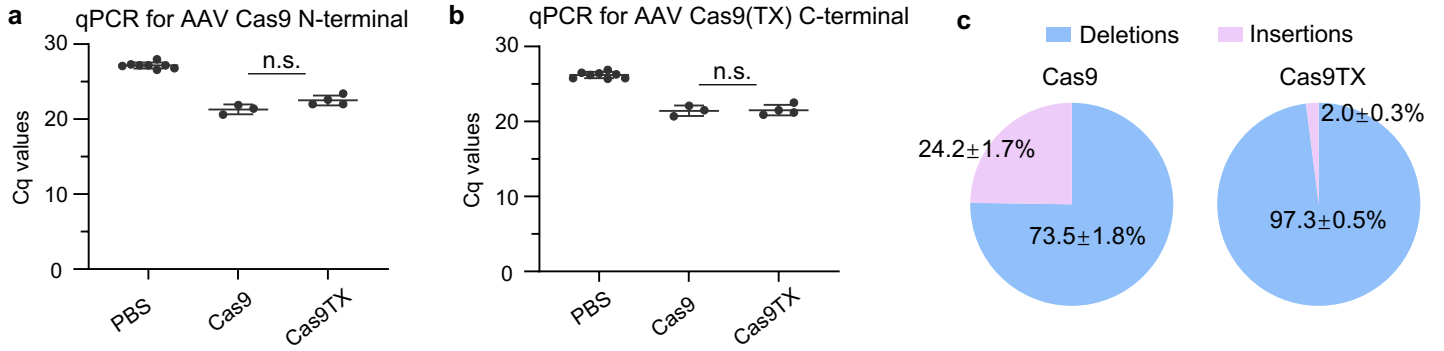

**Supplementary Figure 2 Cas9TX slightly outperforms Cas9 in editing efficiencies.**

**a** and **b**. Cq values for Cas9 N-terminal (**a**) and Cas9(TX) C-terminal (**b**) detected by RT-PCR for the indicated groups. Mean  $\pm$  SD from 8 samples for PBS group, 3 samples for Cas9-treated group, and 4 samples for Cas9TX-treated group. Two-tailed t-test, n.s. means no significance. **c**. Percentages for deletions and insertions in Cas9- and Cas9TX-treated mouse models of AMD at *Vegfa-sg1*.

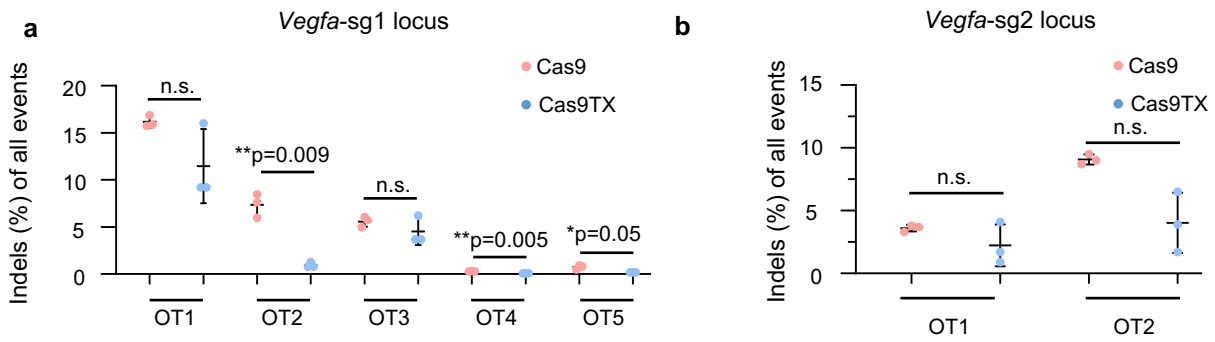

**Supplementary Figure 3 Cas9TX induces similar off-target cleavage as Cas9.**

**a** and **b**. Percentage of indels at *Vegfa-sg1* (a) and *Vegfa-sg2* (b) loci in mouse eyes edited by Cas9 and Cas9TX detected by target sequencing. Mean  $\pm$  SD from 3 samples for both *Vegfa-sg1* and *Vegfa-sg2* locus. Two-tailed t-test, \*p<0.05, \*\*p<0.01, n.s. means no significance.

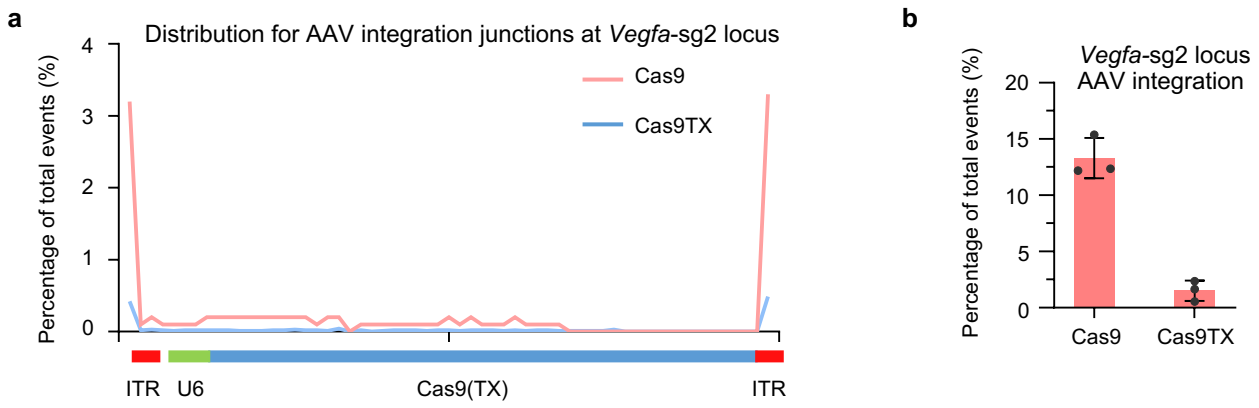

**Supplementary Figure 4 Cas9TX greatly reduces AAV integration at the target site.**

**a.** Distribution for AAV integration junctions at the AAV vectors. **b.** Frequency for AAV integrations at *Vegfa*-sg2 for the indicated groups in mouse models of AMD detected by PEM-seq. Mean  $\pm$  SD from three biological replicates.
